## List of Referees

ICES and the guest editors record their thanks to all those listed below who gave their time and expertise to referee the manuscripts submitted for publication in this issue.

Frank Anderson  
 Jessica André  
 Alexander I. Arkhipkin  
 Yves Cherel  
 Earl G. Dawe  
 Zoë A. Doubleday  
 Dewayne Fox  
 Andrea Y. Frommel  
 Caleb Gardner  
 Mary A. Gasalla  
 Ángel F. González  
 Bridget Green  
 Corey Green  
 Eric Grist  
 Ángel Guerra  
 Roger T. Hanlon  
 Lee Hastie  
 Jonathan Houghton  
 Patrizia Jereb  
 Mark Johnson  
 Elaina Jorgensen  
 Friedemann Keyl  
 Noussithe Koueta  
 Drosos Koutsoubas  
 Tsunemi Kubodera

Vladimir V. Laptikhovsky  
 Stephen Loporati  
 Marek R. Lipiński  
 Gillian N. Lyons  
 Pierre Miramand  
 Natalie A. Moltschanivskyj  
 Ana Moreno  
 Manuel Nevárez-Martínez  
 Owen Nichols  
 Michele K. Nishiguchi  
 Takashi Okutani  
 Pia Orr  
 Jaime Otero  
 Carolina Parada  
 María Cecilia Pardo-Gandarillas  
 Gretta T. Pecl  
 Catalina Perales-Raya  
 Joao Pereira  
 Uwe Piatkowski  
 Graham J. Pierce  
 Tom Polacheck  
 Francisco Rocha  
 Paul G. Rodhouse  
 Rui Rosa  
 R. Iliana Ruiz-Cooley

Mitsuo Sakai  
 Yasunori Sakurai  
 Pilar Sánchez  
 M. Begoña Santos  
 Noriyosi Sato  
 Warwick H. H. Sauer  
 Susumu Segawa  
 Sonia Seixas  
 Jayson Semmens  
 Paul Shaw  
 Elizabeth K. Shea  
 Kate Stark  
 Michael Steer  
 Gabrielle Stowasser  
 Jan Strugnell  
 Chris Talbot  
 Sean Tracey  
 Ed Trippel  
 Erica A. G. Vidal  
 Roger Villanueva  
 Sigurd von Boletzky  
 James Wood  
 Jose Xavier

doi:10.1093/icesjms/fsq097
